# Supplementary material for: IgG Antibody Response to the Pfizer BNT162b2 SARS-CoV-2 Vaccine in Healthcare Workers with Healthy Weight, Overweight, and Obesity
Source: MDPI journal article supplement (doi:10.3390/vaccines10040512), 2022-03-25
Supplement: s1 [file s1]

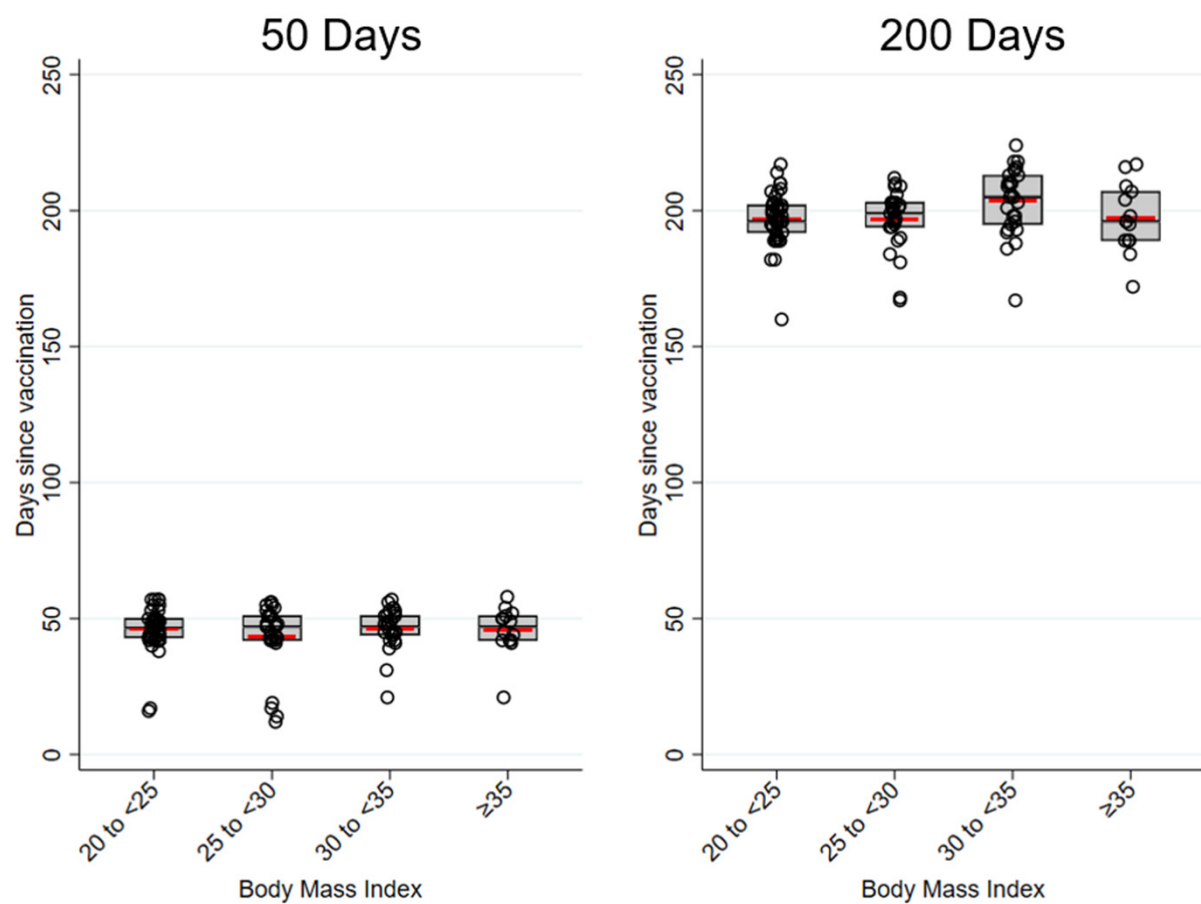

**Supplemental Figure S1.** Time period from immunization to sample collection did not significantly vary among BMI groups.
